# Supplementary material
Source: PubMed Central journal article supplement (PMC3173734)

**Supplemental Table 1.**

Between-site similarity of the gene expression profiles of ovarian tumors sampled at three sites in five different subjects. The height of the tree encompassing the three sites for a given patient in the dendrograms shown in Figure 1, referred to as the cophenetic spanning distance, was used as a measure of similarity, with smaller distances representing more similar gene expression profiles.

| Gene set                            | Cophenetic spanning distance |                                     |           |                    |               | Mean spanning distance for subject |
|-------------------------------------|------------------------------|-------------------------------------|-----------|--------------------|---------------|------------------------------------|
|                                     | Anti-microbials              | Antigen processing and presentation | Cytokines | TGF-beta signaling | TCR signaling |                                    |
| Subject                             |                              |                                     |           |                    |               |                                    |
| 697                                 | 2                            | 3                                   | 2         | 2                  | 3             | 2.4                                |
| 710                                 | 2                            | 2                                   | 2         | 4                  | 2             | 2.4                                |
| 716                                 | 5                            | 3                                   | 2         | 4                  | 2             | 3.2                                |
| 717                                 | 5                            | 2                                   | 2         | 2                  | 3             | 2.8                                |
| 718                                 | 4                            | 2                                   | 2         | 3                  | 4             | 3                                  |
| Mean spanning distance for gene set | 3.6                          | 2.4                                 | 2.0       | 3.0                | 2.8           |                                    |
| Dendrogram max height               | 5                            | 7                                   | 3         | 5                  | 7             |                                    |

## OS according to CD3+ TIL density and heterogeneity

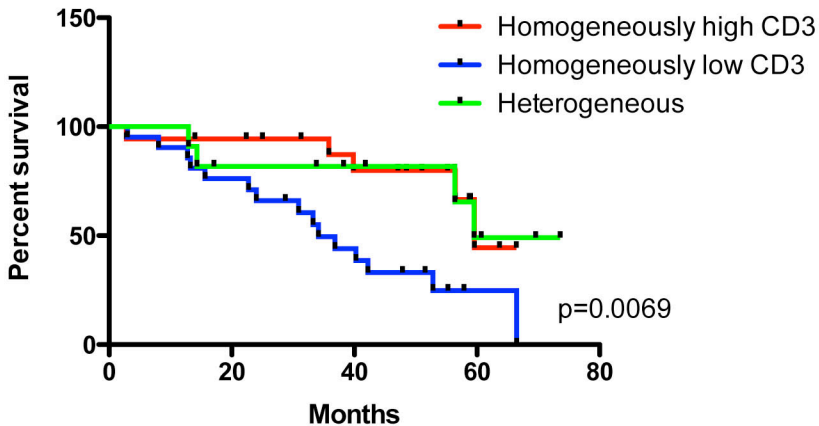

Supplement: cbt1204_0367SD1.pdf [file cbt1204_0367SD1.pdf]
